# Supplementary material for: Effects of substituting soybean meal with corn on immune function and gene expression of gut TLR4 pathway of growing goats
Source: PeerJ. 2022 Feb 7;10:e12910. doi: 10.7717/peerj.12910 (PMC8830315; doi:10.7717/peerj.12910)
Supplement: Supplemental Information 5 [file peerj-10-12910-s005.xlsx]

## Sheet: blood cell counts
		WBC					neu					lym					mon					eos					bas
sample name	group	day 1	day 4	day 7	day 16	day 36	day 1	day 4	day 7	day 16	day 36	day 1	day 4	day 7	day 16	day 36	day 1	day 4	day 7	day 16	day 36	day 1	day 4	day 7	day 16	day 36	day 1	day 4	day 7	day 16	day 36
24	CON	16.09	18.37	13.7	15.57	12.75	8.35	10.11	6.09	7.21	5.14	6.96	7.44	6.98	7.71	7.07	0.3	0.41	0.31	0.3	0.23	0.23	0.26	0.15	0.15	0.12	0.25	0.15	0.17	0.2	0.19
20	CON	9.15	12.14	10.05	15.59	11.62	3.65	5.05	3.51	8.34	6.13	5.01	5.67	5.77	6.73	4.9	0.18	1.03	0.42	0.28	0.21	0.23	0.29	0.28	0.11	0.29	0.08	0.1	0.07	0.13	0.09
17	CON	10.41	10.24	9.4	10.78	10.84	4.5	4.84	4.1	5.26	6.26	5.39	4.86	4.87	4.84	3.92	0.27	0.29	0.18	0.29	0.39	0.11	0.15	0.15	0.27	0.14	0.14	0.1	0.1	0.12	0.13
16	CON	12.08	16.38	12.39	12	12.43	5.61	9.18	5.32	5.73	6.29	5.99	6.49	6.53	5.68	5.51	0.21	0.32	0.24	0.3	0.16	0.08	0.13	0.16	0.11	0.34	0.19	0.26	0.14	0.18	0.13
13	CON	15.7	14.3	14.23	19.62	17.16	8.77	8.43	8.67	14.22	11.64	5.9	5.04	4.79	4.42	3.97	0.33	0.38	0.36	0.5	1.08	0.54	0.34	0.3	0.3	0.32	0.16	0.11	0.11	0.18	0.15
12	CON	14.08	11.56	11.88	11.37	10.92	7.95	5.55	6.71	6.09	5.33	5.61	4.88	4.68	4.74	4.62	0.42	0.98	0.38	0.35	0.81	0.03	0.09	0.03	0.05	0.1	0.07	0.06	0.08	0.14	0.06
8	CON	14.22	12.96	13.15	13.79	10.8	6.72	5.44	4.67	6.22	4.6	7.04	7.15	7.83	7.1	5.7	0.22	0.18	0.36	0.21	0.21	0.13	0.11	0.12	0.13	0.15	0.11	0.08	0.17	0.13	0.14
5	CON	14.51	14.19	15.93	17.07	13.82	6.7	5.49	5.9	10.9	4.1	7.31	8.23	9.46	5.51	8.95	0.32	0.29	0.42	0.35	0.53	0.04	0.07	0.04	0.13	0.14	0.14	0.11	0.11	0.18	0.1
3	CON	11.74	12.45	11.43	13.43	13.35	7.27	7.98	6.53	9.08	8.43	3.89	3.81	4.13	3.88	3.06	0.32	0.4	0.44	0.26	1.51	0.12	0.11	0.19	0.04	0.16	0.14	0.15	0.14	0.17	0.19
2	CON	17.55	17.28	17.61	16.2	17.97	7.57	6.57	7.33	7.45	9.12	9.46	10	9.74	8.12	6.27	0.2	0.21	0.19	0.24	1.93	0.15	0.31	0.2	0.21	0.47	0.17	0.19	0.15	0.18	0.18
1	CON	15.86	13.86	12.63	11.99	16.26	8.45	6.99	6.58	6.52	9.84	6.58	6.27	5.38	4.97	4.72	0.47	0.27	0.4	0.2	1.29	0.17	0.15	0.14	0.14	0.21	0.19	0.18	0.13	0.16	0.2
23	CRS	17.02	15.83	15.43	13.07	13.32	9.87	8.59	9.21	6.11	6.71	6.22	6.38	5.5	5.82	5.9	0.44	0.38	0.31	0.72	0.41	0.21	0.26	0.24	0.2	0.16	0.28	0.22	0.17	0.22	0.14
22	CRS	16.73	12.51	12.62	14.6	9.61	9.46	6.25	5.48	8.1	4.9	6.46	5.53	6.37	5.9	4.2	0.38	0.52	0.4	0.32	0.27	0.16	0.08	0.14	0.09	0.12	0.27	0.13	0.23	0.19	0.12
19	CRS	25.26	18.59	16.06	10.98	14.72	17.02	9.91	7.89	4.6	8.9	7.77	8.29	7.72	5.74	5.33	0.26	0.17	0.23	0.34	0.26	0.05	0.11	0.12	0.19	0.09	0.16	0.11	0.1	0.11	0.14
18	CRS	11.08	11.8	11.32	11.22	14.16	4.2	4.77	4.89	4.48	8.12	6.31	6.46	5.76	5.85	4.83	0.2	0.21	0.25	0.51	0.71	0.25	0.21	0.27	0.19	0.32	0.12	0.15	0.15	0.19	0.18
15	CRS	16.25	16.2	15.07	14.36	18.69	8.36	7.2	5.61	6.78	12.07	6.68	8.18	8.76	6.82	5.57	0.5	0.45	0.37	0.37	0.64	0.41	0.14	0.19	0.13	0.16	0.3	0.23	0.14	0.26	0.25
14	CRS	19.08	14.08	16.1	18.6	13.14	12.43	7.54	8.24	9.88	7.06	5.77	5.45	6.22	5.56	4.69	0.27	0.14	0.25	0.23	0.28	0.4	0.83	1.24	2.72	0.92	0.21	0.12	0.15	0.21	0.19
10	CRS	23	17.16	15.24	16.02	17.12	13.09	6.65	5.96	5.04	9.03	9.16	9.88	8.46	9.5	7.4	0.35	0.28	0.37	0.17	0.27	0.07	0.15	0.19	1.17	0.27	0.33	0.2	0.26	0.14	0.15
9	CRS	16.34	18.18	20.79	15.93	18.1	9	10.03	13.14	9.1	11.55	6.72	7.44	6.99	6.27	4.91	0.36	0.48	0.42	0.36	1.36	0.11	0.05	0.08	0.07	0.17	0.15	0.18	0.16	0.13	0.11
7	CRS	12.12	9.7	12.54	11.12	13.66	5.75	3.51	6.43	5.86	8.46	5.38	5.53	5.02	4.72	3.42	0.66	0.34	0.8	0.31	1.49	0.14	0.13	0.14	0.1	0.15	0.19	0.19	0.15	0.13	0.14

## Sheet: cytokines and antibodies
		IL-4		IL-5		IL-13		IgG		IgA		IgM
sample name	group	d7	d36	d7	d36	d7	d36	d7	d36	d7	d36	d7	d36
1	CON	48.0609	39.7765	626.259	463.005	423.065	356.405	214.343	356.872	219.551	159.408	1359.34	2204.62
2	CON	37.7576	53.0036	417.184	482.577	357.124	480.921	329.016	436.029	134.151	183.878	1208.76	1678.97
3	CON	51.037	50.8803	632.245	675.994	427.197	456.125	148.65	501.722	131.694	183.092	1232.03	1573.57
5	CON	37.3225	48.3915	624.647	596.555	389.106	420.37	380.781	540.952	153.413	255.421	1346.33	2060.2
8	CON	32.519	63.1328	390.014	561.556	248.241	475.171	155.846	636.591	104.767	196.948	1678.97	2099.22
12	CON	40.4379	61.0617	563.398	728.493	313.103	394.137	242.663	535.149	161.766	282.25	1070.5	2111.54
13	CON	31.4748	57.4765	459.552	701.093	304.838	306.815	275.626	492.901	155.968	234.194	1581.1	1881.57
16	CON	54.6048	62.0537	468.532	675.994	370.42	452.532	324.373	668.625	154.396	240.091	1370.97	2246.37
17	CON	60.2263	50.7585	549.583	596.555	403.66	506.434	500.561	415.601	251.589	280.481	1976.7	2344.25
20	CON	52.847	51.8201	581.588	647.903	399.887	287.41	509.847	608.271	275.371	239.992	2167.66	1737.15
24	CON	53.9956	54.3089	517.346	701.093	382.818	387.669	442.529	513.561	166.287	288.933	1696.77	2414.06
7	CRS	41.7954	48.4263	520.8	621.193	457.563	423.065	314.16	542.113	200.29	247.756	1142.37	1948.64
9	CRS	37.427	63.916	478.893	647.903	259.74	502.841	336.212	621.038	111.45	250.704	1104.04	2294.28
10	CRS	44.7541	57.111	521.952	486.262	441.212	450.016	297.214	494.062	148.696	219.945	1474.32	1682.39
14	CRS	49.1747	64.9776	614.976	463.005	289.925	456.485	387.745	537.47	223.679	207.267	1971.91	2036.25
15	CRS	43.9535	67.5012	471.295	482.577	294.417	445.524	330.177	628.002	275.568	237.634	1835.02	1907.57
18	CRS	58.1204	60.818	604.154	621.193	497.81	438.158	343.176	465.045	273.602	187.907	1655.02	1947.96
19	CRS	47.1732	54.657	730.566	561.556	360.538	347.242	439.743	461.563	186.237	265.151	2069.79	2329.87
22	CRS	57.9812	51.037	417.414	486.262	388.747	411.566	295.589	406.78	153.02	211.002	1939.74	2433.22
23	CRS	58.9036	62.367	415.342	728.493	370.959	453.969	278.411	486.866	241.368	233.31	1433.94	2226.52

## Sheet: TLR4 pathway expression
sample name	location	group		TLR4	IL-18	TNF-α	IL-1β	IFN-β	TIRAP	MYD88	IRAK1	TRAF6	NF-Κb	MAPK1	AP-1	IRF3	TBK1	NLRP3
2	Duodenum	CON	1	0.837283	0.497005	0.530288	0.379367	0.438332	0.303705	0.713972	1.25992	1.10411	1.00674	0.804018	0.604124	0.532353	0.871923	0.358564
3	Duodenum	CON	2	0.805034	0.743807	0.415095	0.277713	0.147181	0.450852	0.75381	1.32103	0.972349	0.752465	1.42106	0.716688	0.610805	0.976442	0.503002
5	Duodenum	CON	3	0.899454	0.61543	0.240068	0.143753	0.0753108	0.367057	0.818246	1.11214	1.18062	1.15912	0.992157	0.450495	0.695178	0.969697	0.429373
8	Duodenum	CON	4	0.521397	0.736964	0.589753	0.373281	0.115077	0.681794	0.639023	0.92445	0.858295	0.819622	0.896248	0.711819	1.15305	1.09602	0.411406
12	Duodenum	CON	5	0.691174	0.725141	0.313133	0.313891	0.142332	0.979923	0.594853	1.44393	0.979112	0.770053	0.948448	1.10032	0.620767	0.867903	0.393282
13	Duodenum	CON	6	1.5197	0.663669	0.563771	0.314617	0.134863	0.329285	0.574591	0.587095	0.999685	0.992884	1.01769	1.10002	0.707508	0.775002	0.944073
16	Duodenum	CON	7	0.816272	0.697002	0.296927	0.285521	0.432968	1.20364	0.529954	0.831238	0.939227	0.682877	0.828538	0.401346	0.452332	0.821086	0.476794
17	Duodenum	CON	8	0.656919	0.583814	0.324176	0.391839	1.3541	2.54161	0.68806	1.04247	0.848437	0.631285	0.820912	2.14788	0.959566	1.05868	0.403872
24	Duodenum	CON	9	0.631617	0.657854	0.357211	0.303198	0.435868	1.87262	0.6739	1.16473	1.00664	0.825323	0.771266	0.75083	0.636011	0.992363	0.37078
7	Duodenum	CRS	10	0.462905	1.09784	0.304571	0.219405	0.740978	1.02983	0.503689	1.29834	0.988203	0.880481	1.01887	1.21384	0.826711	0.960776	0.900399
9	Duodenum	CRS	11	0.474272	1.23799	0.451099	0.51943	0.746907	1.90316	0.801406	1.18921	0.884466	0.797209	0.866721	3.96664	0.996854	1.39694	0.195961
10	Duodenum	CRS	12	0.847012	0.61401	0.547722	0.443908	1.44466	0.36368	0.691247	0.950439	1.55784	1.44697	0.95174	0.19339	0.875872	1.12944	0.361547
15	Duodenum	CRS	13	1.14773	0.0158395	1.04115	1.28491	2.58291	0.862985	1.61769	1.49658	1.07889	0.735279	0.955045	1.3103	1.95494	1.99392	1.9706
18	Duodenum	CRS	14	0.841161	0.994448	0.581633	0.595291	0.473794	2.42403	0.84417	0.95705	1.38307	1.42375	1.06337	0.710177	0.847012	1.30641	1.1619
19	Duodenum	CRS	15	0.482005	0.792025	0.348247	0.310285	2.41552	2.79092	0.641241	1.44393	0.997378	0.976955	0.929998	2.19086	0.613636	1.10747	0.207373
22	Duodenum	CRS	16	0.587959	0.945302	0.583653	0.30566	0.17872	1.30955	0.542341	0.795536	0.900967	0.848526	1.13051	0.884489	0.669175	1.14653	0.663715
23	Duodenum	CRS	17	0.436924	0.813922	0.396809	0.435778	1.04657	3.00162	0.866901	1.30435	1.03973	0.934995	0.988036	1.49567	1.38075	1.09349	0.63228
1	Jejunum	CON	1	1.0237	3.46935	0.926491	2.19112	1.04054	0.943269	1.05259	0.907519	0.827145	0.768276	0.989862	2.23978	1.65916	0.986647	0.301864
2	Jejunum	CON	2	0.944172	2.34945	1.24388	1.27603	1.90836	0.976705	0.953038	0.850667	1.04696	1.03744	0.942981	0.0882608	0.74766	0.970818	1.53011
3	Jejunum	CON	3	0.620766	3.22955	0.628441	0.352737	0.228036	1.25657	0.91633	0.516438	0.64003	0.591738	0.702368	0.0896999	0.62653	0.820138	1.93903
5	Jejunum	CON	4	0.776714	3.01612	1.1446	0.974905	3.10014	0.603705	1.0429	0.939523	1.12211	1.26257	0.983032	1.51113	2.12695	1.2119	1.40799
8	Jejunum	CON	5	1.67457	4.96263	1.06303	0.85362	0.495029	0.847257	0.794034	0.636545	1.03853	0.970206	1.04993	2.96842	0.683235	1.0429	0.64259
12	Jejunum	CON	6	0.993405	9.0192	1.08286	0.935191	2.42391	1.28706	1.01673	1.42734	1.11952	1.14846	1.14365	5.16195	0.391058	1.02262	2.52037
13	Jejunum	CON	7	0.964011	4.17372	0.931858	0.875594	0.706617	0.76088	0.973064	1.13813	0.999685	0.956849	0.904567	1.02901	1.17185	0.775002	2.07815
16	Jejunum	CON	8	1.95494	2.63232	1.63752	1.5966	0.372161	1.62722	1.41481	1.2072	1.52931	1.5761	1.21585	1.04578	1.08708	1.16388	5.74366
17	Jejunum	CON	9	1.10864	7.85167	0.772808	1.24977	0.412462	0.734113	1.00273	0.866537	0.979112	1.10167	1.06337	1.30699	1.07583	1.02144	1.83864
20	Jejunum	CON	10	0.700823	3.40188	1.01502	0.906471	1.00046	1.90405	0.953038	1.49831	1.17518	1.0815	1.22431	2.66275	1.54448	0.967459	2.81923
24	Jejunum	CON	11	0.880943	2.69696	0.875502	0.82264	2.7082	4.51296	0.982098	1.64718	0.786151	0.83878	0.902482	6.53377	1.06964	1.10492	0.507672
7	Jejunum	CRS	12	0.602398	2.31017	0.919029	0.588453	0.220523	1.86272	0.70904	0.788218	0.919898	0.909427	0.889028	2.54669	1.12932	0.974188	0.842045
10	Jejunum	CRS	13	0.731428	4.96352	0.578952	1.06191	0.281395	1.38097	0.68806	0.643197	0.723407	0.594479	0.796624	0.0686903	0.633807	1.04652	0.866719
15	Jejunum	CRS	14	1.72962	5.07357	1.55277	1.73508	2.28786	3.53263	1.20353	1.67018	1.16437	1.89609	0.867725	10.1465	3.97822	1.14918	6.66669
18	Jejunum	CRS	15	1.25451	5.86853	0.824456	1.36446	1.36194	0.500257	1.15051	0.881684	1.35618	1.18621	1.13443	1.1999	0.731426	0.84417	1.80496
19	Jejunum	CRS	16	0.879926	3.97145	0.756904	0.753493	0.171229	0.553149	0.835439	0.97716	1.00432	1.03984	1.01066	1.67937	0.967353	1.2431	0.883909
22	Jejunum	CRS	17	0.930098	4.94053	1.63374	0.760489	0.294023	0.937836	0.922704	0.909618	0.661072	0.995181	1.13969	0.283139	0.921544	0.75207	0.219705
23	Jejunum	CRS	18	1.29575	9.98434	1.67193	0.785491	1.39539	2.22028	0.364487	1.15136	1.22226	0.888656	0.960575	1.90253	1.30326	0.852008	1.88067
2	Ileum	CON	1	2.73926	3.33187	1.44879	1.05336	4.11436	1.76835	1.03331	1.04972	0.890618	1.21675	1.13182	0.368461	1.15305	0.915272	1.6958
3	Ileum	CON	2	1.1732	2.71258	1.82958	0.609205	0.630252	1.58089	0.838339	0.974905	1.05913	1.76504	1.04148	0.30948	0.900491	0.76876	0.565907
5	Ileum	CON	3	0.695178	4.7338	0.770134	0.609205	1.26377	0.26378	0.820138	0.810378	1.59057	1.74074	0.936473	0.512722	0.677731	0.798634	0.77484
8	Ileum	CON	4	0.995703	6.26798	0.633543	1.18236	0.739181	1.86702	0.924838	1.71713	1.19987	1.21956	2.38993	0.672645	0.643399	0.914215	1.72744
12	Ileum	CON	5	1.48499	5.33813	0.870513	0.807574	2.52753	2.26693	0.924838	1.12506	1.30394	1.07403	1.81752	0.465827	0.807379	1.0357	0.897284
16	Ileum	CON	6	1.61379	5.51362	0.962493	0.712025	0.565396	1.23723	1.34469	0.283876	1.67351	1.12742	0.577799	0.296858	0.743668	0.80326	0.62574
17	Ileum	CON	7	0.661303	2.69384	0.439778	0.91067	1.54523	0.296083	0.340078	0.106456	1.30998	1.00674	0.811487	0.481828	0.87109	0.573927	1.12507
20	Ileum	CON	8	1.24297	5.36905	1.01973	0.99424	0.565396	0.885199	0.887164	1.17013	1.15366	1.22238	1.20189	0.198368	0.865811	0.846123	0.279058
24	Ileum	CON	9	1.2034	3.15944	1.01268	1.49658	2.59788	1.51649	1.06728	1.30285	1.25082	1.30107	1.02004	0.250506	0.603792	1.05016	2.43452
14	Ileum	CRS	10	3.30302	3.21304	0.687175	0.862456	1.57027	0.899042	0.739183	0.880873	1.39102	2.07873	0.990754	0.471549	0.84715	0.668938	0.569817
15	Ileum	CRS	11	4.33827	1.99954	1.78986	1.97703	2.7082	3.18378	0.676239	1.54043	2.85379	3.5138	1.30613	1.11439	0.998944	1.2119	2.00042
18	Ileum	CRS	12	1.50225	5.9571	1.74254	1.65408	3.73989	3.13194	1.03767	1.33769	1.80837	1.30695	1.23817	0.735903	1.24074	1.29016	1.45492
19	Ileum	CRS	13	1.10353	5.51362	1.08537	0.642455	0.24925	1.37625	0.986647	0.866537	1.24506	1.08902	1.04873	0.191611	1.52146	0.936666	0.386526
22	Ileum	CRS	14	1.27791	5.20416	1.09544	1.37713	2.75872	3.17643	0.935584	1.17555	1.40725	1.1618	1.02477	0.790726	1.09591	1.04652	0.526791
23	Ileum	CRS	15	0.980861	5.62297	0.888749	1.03646	4.90414	0.325503	0.955243	0.854607	0.892678	1.00674	1.07821	0.31818	0.559467	0.723103	1.13574
1	Colon	CON	1	0.666089	0.229463	0.432149	2.9897	8.33395	1.12045	0.82871	1.5728	1.3943	1.73271	1.2846	2.97166	1.49705	0.832548	2.70439
2	Colon	CON	2	1.54627	0.345398	0.330082	1.34879	4.06463	2.49794	0.968577	1.53688	1.56867	1.48079	1.11749	1.21972	1.97994	0.884095	1.5213
5	Colon	CON	3	1.95946	0.726818	0.824456	0.871557	9.68443	0.876043	0.887164	1.03288	1.30696	1.09913	0.669293	1.71465	1.12671	0.726452	1.13181
12	Colon	CON	4	1.32298	0.456318	0.5518	1.24977	3.23117	3.13995	1.21751	1.7211	1.41704	2.22381	0.846282	4.72361	3.05702	1.0393	3.46287
13	Colon	CON	5	0.715548	0.319303	1.40755	1.97019	4.57296	1.77449	0.985508	1.61702	1.39109	1.45031	1.41677	2.63217	1.83883	0.882054	1.0319
16	Colon	CON	6	1.07459	1.11188	0.442111	2.09217	6.61023	1.96438	0.835439	1.61328	1.28302	1.45703	1.03874	2.92795	3.38805	1.09097	1.22149
17	Colon	CON	7	1.97081	0.565396	0.861456	1.47087	2.43232	0.719005	0.557589	1.08673	1.15632	1.16314	1.05442	0.910407	1.67263	0.84417	0.782034
20	Colon	CON	8	1.44438	0.00504709	0.8729	1.09556	2.37884	3.99282	1.21471	1.34102	0.886512	0.922122	1.96018	8.91509	2.088	0.943181	1.85143
24	Colon	CON	9	1.90148	0.285221	1.03186	1.67791	11.2668	1.9895	0.879003	1.19058	1.03494	1.11964	1.10871	0.685986	1.5197	0.666929	1.141
14	Colon	CRS	10	4.72361	0.180277	2.62621	2.62989	12.4436	3.04352	1.12034	1.68568	1.55784	1.84424	1.46948	4.1783	1.96626	1.1011	3.55201
15	Colon	CRS	11	9.80684	0.354289	2.62809	3.64689	20.1681	3.05372	1.22882	2.10429	2.10849	2.47889	1.37424	6.19563	5.27359	1.6536	2.48855
18	Colon	CRS	12	2.1358	0.41431	2.6758	2.17213	19.0643	3.40442	2.22264	1.75727	2.30998	1.8939	1.21585	4.53546	4.33327	1.31246	1.48655
19	Colon	CRS	13	1.49878	0.293722	2.40592	1.29684	17.1761	2.97744	1.04773	1.39152	0.838691	0.952438	0.87174	2.56019	3.2878	1.14785	0.789295
22	Colon	CRS	14	1.42779	0.210287	2.16865	1.82766	14.5102	2.41285	0.717279	1.14605	0.907233	0.945859	0.709711	4.36708	1.82614	0.800481	1.30613
23	Colon	CRS	15	0.985404	0.406264	2.3148	1.47257	29.6988	3.42018	1.25464	1.5874	1.26828	1.25966	1.22856	4.36581	2.00758	1.16927	1.387
